# Supplementary material
Source: PubMed Central journal article supplement (PMC4936041)
Supplement: rspb20160816supp1.pdf [file rspb20160816supp1.pdf]

*The following supplement accompanies the article*

**The paradox of inverted biomass pyramids in kelp forest fish communities**

Rowan Trebilco<sup>1,2\*</sup>, Nicholas K. Dulvy<sup>1</sup>, Sean C. Anderson<sup>1</sup>, & Anne K. Salomon<sup>3</sup>

<sup>1</sup>Earth to Ocean Research Group, Biological Sciences, Simon Fraser University, 8888 University Drive, Burnaby, BC, Canada V5A 1S6

<sup>2</sup>Antarctic Climate and Ecosystems Cooperative Research Centre, University of Tasmania, Private Bag 80, Hobart, TAS 7001 Australia

<sup>3</sup>School of Resource and Environmental Management, Simon Fraser University, 8888 University Drive, Burnaby, BC, Canada V5A 1S6

\* *Corresponding author email:* [rtrebilc@sfu.ca](mailto:rtrebilc@sfu.ca)

# 1 Supplementary materials for methods

## 2 Study area

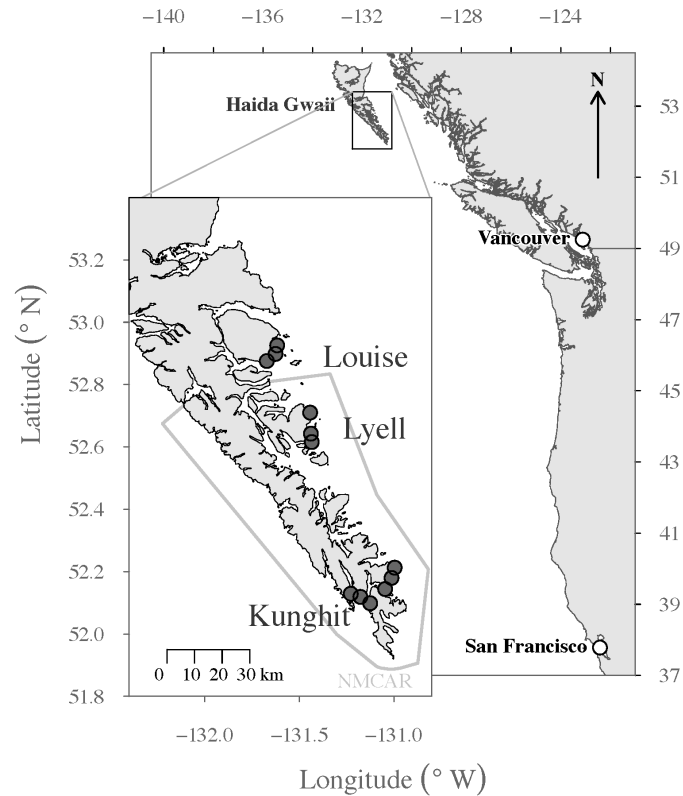

**Figure S1:** Study sites (points) were located on the southern shores of Haida Gwaii (formerly the Queen Charlotte Islands) off the northwest coast of British Columbia, Canada. The boundaries of the Gwaii Haanas National Marine Conservation Area Reserve (NMCAR) and Haida Heritage Site are shown in light gray.

## 3 Survey methods

4 Surveys were undertaken in the summer (between late June and early August) each  
5 year from 2009 to 2012, with the majority of sites surveyed every year, yielding a total  
6 of 37 unique combinations of site and year in the dataset (a full summary of survey  
7 protocol is provided in [1]). Four to six 30 m long by 4 m wide belt transects were  
8 surveyed at each site in each year (four at each site in 2009, six at each site in 2010,  
9 2011 and 2012), split evenly between ‘deep’ and ‘shallow’ strata (tide-corrected depth  
10 of  $12.0 \pm 1.3$  m and  $7.7 \pm 1.1$  m below chart datum respectively). Transects were

11 deployed parallel to shore, with the ends of each transect separated by a minimum of 5  
12 m. For each transect an individual diver deployed a plastic transect meter tape while  
13 swimming forward at an approximately constant speed [2], recording conspicuous fishes  
14 present in the sampling area (all fishes other than blennies, gobies, gunnels and other  
15 small cryptic species, table S1). Count time was not standardised as it was dependent  
16 on fish abundance and habitat characteristics.

## 17 **Sample processing and stable isotope analysis**

18 In the laboratory, white muscle tissue samples were thawed, rinsed with 10% HCl  
19 followed by de-ionised water, and oven dried for 48 hours at 60°C. Samples were then  
20 manually ground to a fine powder and  $1 \pm 0.2$  mg portions were packaged into 5 x 3.5  
21 mm tin capsules.  $\delta^{13}\text{C}$  and  $\delta^{15}\text{N}$  values for packaged samples were measured using a  
22 PDZ Europa ANCA-GSL elemental analyzer interfaced to a PDZ Europa 20–20 isotope  
23 ratio mass spectrometer.  $\delta^{13}\text{C}$  and  $\delta^{15}\text{N}$  were calculated as:

$$24 \delta^{15}X = \left( \frac{R_{\text{sample}}}{R_{\text{standard}}} - 1 \right) \times 1000$$

25 where  $R_{\text{sample}}$  and  $R_{\text{standard}}$  are the ratio of heavy:light isotopes ( $^{13}\text{C}:^{12}\text{C}$  and  $^{15}\text{N}:^{14}\text{N}$ )  
26 in the sample and the international standard (V-PBD for C and air for N) respectively.  
27  $\delta$  units are parts per thousand (‰). Stable isotope analyses were conducted by the UC  
28 Davis Stable Isotope Facility (SIF).

29 In this study we implicitly assumed that a shared isotopic baseline for  $\delta^{15}\text{N}$  was rep-  
30 resentative of all fish sampled. This assumption was supported by the observation of  
31 a mean  $\delta^{15}\text{N}$  of 10.32 (n = 47, s.d. = 0.4) for rock scallops (*Crassodoma gigantea*)  
32 that were opportunistically collected at the same sites where fish were sampled (plac-  
33 ing them one trophic level below the smallest fish sampled). Because they are among  
34 the longest-lived filter-feeding invertebrates present on the reefs of Haida Gwaii, rock  
35 scallops provide a time-integrated baseline estimate for  $\delta^{15}\text{N}$  for this system.

## 36 **Zero-handling in biomass spectrum fits**

37 In this manuscript we follow the precedent in the literature of treating size classes  
38 in which no biomass was observed as empty rather than as zeros in fitting biomass  
39 spectra. In order to determine whether our conclusions were sensitive to this decision  
40 we fit a second model in which we populated empty bins for a given location/year  
41 with a biomass equal to half the minimum of the biomass observed in that bin across  
42 other locations/years. Doing so resulted in a decreased slope estimate (0.33, 95% CIs  
43 0.03–0.62) but does not affect our conclusions.

## 44 **Bayesian hierarchical approach to estimate community predator-** 45 **to-prey mass ratio**

46 We used a Bayesian hierarchical approach to model the community relationship between  
47 trophic position and body-size, and estimated the community mean PPMR from the  
48 posterior distribution of slopes of this relationship. Our calculation of PPMR from the  
49 slope of the community relationship between trophic position and body-size followed  
50 [3]. Adopting a Bayesian hierarchical approach allowed us to account for the nested  
51 nature of the data (species sampled within locations) and to explicitly incorporate im-  
52 portant sources of uncertainty, including instrument error in measurements of  $\delta^{15}\text{N}$  and  
53 uncertainty in the assumed rate of  $\delta^{15}\text{N}$  fractionation ( $\Delta^{15}\text{N}$ ) with increasing trophic  
54 position.

55 Preliminary exploratory analyses fitting models with the R package `lme4`, and not  
56 accounting for measurement error, indicated that a random-effect structure allowing  
57 slope to vary randomly with species and an intercept to vary randomly with species  
58 and area was best supported by the data (lowest AIC). We retained this random-effect  
59 structure in the Bayesian model that we describe below. These preliminary analyses  
60 also indicated minimal correlation between random slopes and intercepts. Therefore,  
61 for simplicity, we proceeded with a Bayesian hierarchical model that did not model  
62 correlation between random effects.

63 To build our model, we first assigned each individual fish for which  $\delta^{15}\text{N}$  was measured  
64 into  $\log_2$  body mass classes ( $\log_2 M$ ). We centered the  $\log_2 M$  predictor by subtract-  
65 ing the mean to reduce correlation between random effect intercepts and slopes then  
66 modeled  $\delta^{15}\text{N}$  as (with  $\mathcal{N}$  denoting normal distributions,  $\sigma$  and  $\tau$  denoting standard  
67 deviations about the means):

$$68 \delta^{15}\text{N}_i^{\text{true}} = \alpha + \alpha_j + \alpha_k + (\beta + \beta_j) \cdot \log_2 M_i + \epsilon_i,$$

69 For  $i = 1, \dots, N$  observations,  $j = 1, \dots, J$  species,  $k = 1, \dots, K$  locations,

$$70 \alpha_j \sim \mathcal{N}(0, \sigma_\alpha^2), \quad \beta_j \sim \mathcal{N}(0, \sigma_\beta^2), \quad \alpha_k \sim \mathcal{N}(0, \tau_\alpha^2), \quad \epsilon_i \sim \mathcal{N}(0, \sigma^2).$$

71 We incorporated measurement error around  $\delta^{15}\text{N}_i^{\text{true}}$  as:

$$72 \delta^{15}\text{N}_i^{\text{measured}} \sim \mathcal{N}(\delta^{15}\text{N}_i^{\text{true}}, 0.04),$$

73 where  $\delta^{15}\text{N}_i^{\text{measured}}$  represents a measured value of  $\delta^{15}\text{N}$  and 0.04 represents the assumed  
74 measurement variance (based on personal communication from the UC Davis SIF).

75 We chose non-informative normal priors on  $\{\alpha, \alpha_j, \alpha_k, \beta, \beta_j\} \sim \mathcal{N}(0, 10^6)$ , a uniform  
76 prior  $U(0, 100)$  on the residual standard deviation  $\sigma$ , and weakly informative half-  
77 Cauchy priors with scale parameters of 10 on the standard deviation parameters  $\sigma_\alpha, \sigma_\beta$   
78 and  $\tau_\alpha$  to constrain the parameter to reasonable values and aid computation [4]. The  
79 shape the half-Cauchy priors (lines; scale parameter of 10) used on standard devia-  
80 tion hyperparameters is shown below overlain on their observed posterior distributions  
81 (bars). The priors are unlikely to drive the posterior distributions of the standard devi-  
82 ation hyperparameters as they allow for far greater values than the data suggest, while  
83 somewhat limiting extreme values and thereby aiding computation:

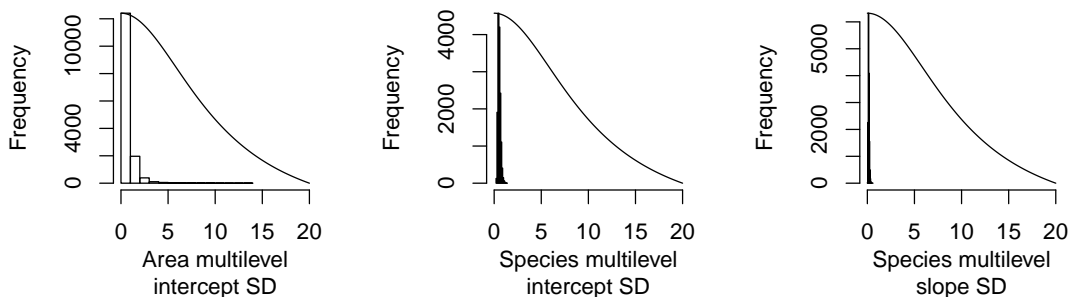

84 We then estimated PPMR incorporating uncertainty in fractionation rate ( $\Delta^{15}\text{N}$ ) as:

85 
$$\text{PPMR} = 2^{\Delta^{15}\text{N}/\beta}, \quad \Delta^{15}\text{N} \sim \mathcal{N}(\mu_{\Delta^{15}\text{N}}, \sigma_{\Delta^{15}\text{N}}^2).$$

86 We assumed a mean fractionation ( $\mu_{\Delta^{15}\text{N}}$ ) of 3.2 ‰ with a standard deviation ( $\sigma_{\Delta^{15}\text{N}}$ )  
 87 of 1. 3.2 ‰ has been recommended as an assumed value for fish white muscle tissue  
 88 [5], and adding a wide standard deviation around this assumed mean encompasses the  
 89 other widely recommended value of 3.4 ‰ [6, 7] as well as making our PPMR estimate  
 90 robust to emerging evidence that fractionation rate may vary with body-size and species  
 91 (although such variation is likely to be small within the range of body-sizes considered  
 92 here; [8, 9]).

93 We drew samples from the posterior distribution of all parameters using JAGS [10]. We  
 94 ran 100,000 iterations with three chains, discarded the first 50,000 iterations as burn in,  
 95 and recorded every 10<sup>th</sup> iteration value thereafter for a total of 15,000 posterior samples.  
 96 We assessed chain convergence with the Gelman-Rubin diagnostic (all were below 1.1)  
 97 and visual inspection of the chains [11] and performed graphical posterior predictive  
 98 checks (as shown below) to ensure our probability model could recreate similar data [11].  
 99 These show realizations of the parameter vector  $\theta$  from the posterior samples. The left  
 100 panel corresponds to the observed data and the two panels to the right correspond to  
 101 replicated datasets simulated from the model. The colours represent different species.  
 102 The replicated datasets  $y^{\text{rep}}$  resemble our original dataset  $y$  and we do not observe  
 103 systematic differences in the datasets:

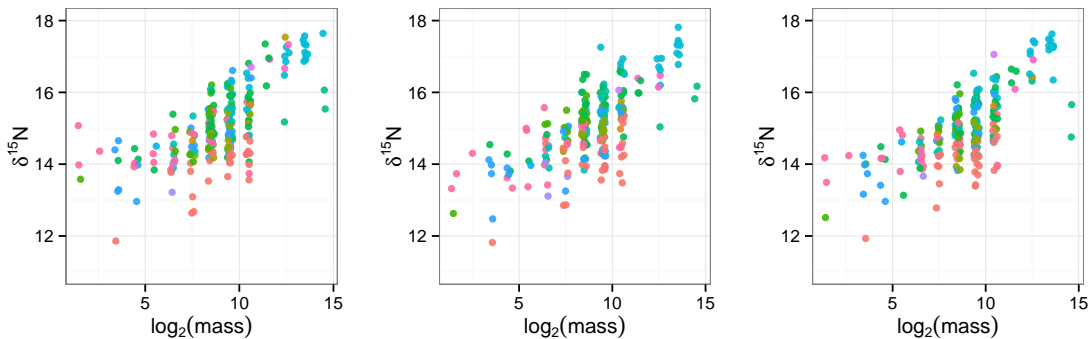

104 We also examined the residuals from two example MCMC draws arranged along the  
 105 the predictor ( $\log_2 M$ ) and shown by species (with colour for area):

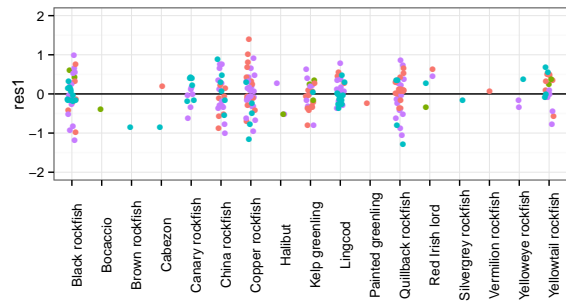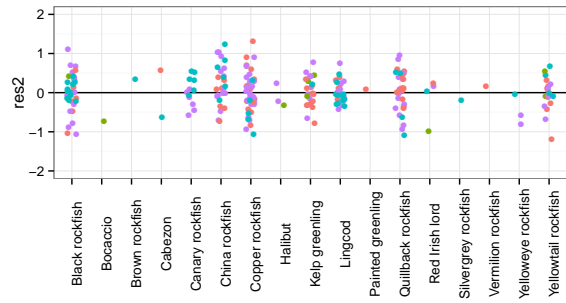

106 And by area (with colour for species):

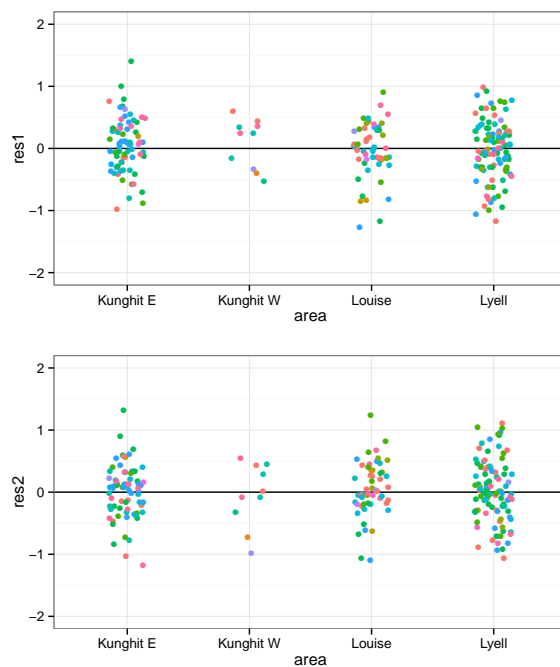

107 The lack of structure of the residuals in both representations indicates that there is  
 108 not systematic unaccounted-for variation associated with either location or species that  
 109 may be biasing the models.

110 We performed a jackknife procedure to evaluate sensitivity of estimated PPMR to the  
 111 individual species included in the analysis. For each jackknife we ran 10,000 model  
 112 iterations with 3 chains, discarding the first 5000 as burn-in and keeping every 5<sup>th</sup>  
 113 iteration value thereafter for a total of 3000 saved samples per jackknife.

114 The JAGS code for the model was:

```

115 model {
116   # Priors
117   b0 ~ dnorm(0, 1.0E-6) # intercept
118   b1 ~ dnorm(0, 1.0E-6) # slope
119   sigma_res ~ dunif(0, 100) # residual SD
120
121   # weakly informative priors (Gelman 2006)
122   # half-Cauchy with scale parameter of 10
123   sp_b0_sd ~ dt(0, 1/(10*10), 1) T(0, ) # species intercept multilevel SD
124   sp_b1_sd ~ dt(0, 1/(10*10), 1) T(0, ) # species slope multilevel SD
125   ar_b0_sd ~ dt(0, 1/(10*10), 1) T(0, ) # location intercept multilevel SD
126
127   # Transformations from variance to precision

```



```

128 tau_res <- pow(sigma_res, -2)
129 frac_tau <- pow(frac_sd, -2)
130 sp_b0_tau <- pow(sp_b0_sd, -2)
131 sp_b1_tau <- pow(sp_b1_sd, -2)
132 ar_b0_tau <- pow(ar_b0_sd, -2)
133 d15N_tau <- pow(d15N_sd, -2)
134
135 # Multilevel effects for species
136 for (j in 1:N_sp) {
137   sp_b0[j] ~ dnorm(0, sp_b0_tau) # intercepts
138   sp_b1[j] ~ dnorm(0, sp_b1_tau) # slopes
139 }
140
141 # Multilevel effects for location
142 for (k in 1:N_ar) {
143   ar_b0[k] ~ dnorm(0, ar_b0_tau) # intercepts
144 }
145
146 # Likelihood data model
147 for (i in 1:N) {
148   y_hat[i] <- b0 + sp_b0[sp[i]] + ar_b0[location[i]] +
149     (b1 + sp_b1[sp[i]]) * log_m[i] # predicted delta 15 N
150   obs_delta[i] ~ dnorm(delta[i], d15N_tau) # measurement error on d15N
151   delta[i] ~ dnorm(y_hat[i], tau_res) # likelihood model
152 }
153
154 # Derived values
155 frac ~ dnorm(frac_mu, frac_tau) # fractionation rate with error
156 ppmr_exponent <- frac / b1 # exponent in PPMR equation
157
158 # Predictions at location random effect of zero
159 for (i in 1:N) {
160   y_hat2[i] <- b0 + sp_b0[sp[i]] +
161     (b1 + sp_b1[sp[i]]) * log_m[i] # predicted delta 15 N
162 }
163
164 # Fixed effect predictions at smoothed set of log_m
165 for (h in 1:N_pred) {
166   y_hat3[h] <- b0 + b1 * log_m_pred[h] # predicted delta 15 N at smoothed log_m
167 }
168 }

```

## 169 **Biomass-weighted hierarchical linear model for the estimation** 170 **of community PPMR**

171 We also evaluated a biomass-weighted hierarchical linear model to estimate community  
172 PPMR. Using visual survey data, we calculated the proportion of the total observed  
173 biomass in each size bin contributed by each species in each location (with biomass  
174 from all survey observations summed within locations). These proportions were then  
175 matched to isotope samples based on the species from which it was obtained, its mass,  
176 and the location where it was sampled, and included as weightings in a hierarchical  
177 linear model for the relationship between trophic position and individual body mass,  
178 fit using the R package `lme4` [12]. Not all species for which isotope samples were  
179 obtained were observed on visual surveys. Further, not all species that were observed  
180 on surveys were observed at all sizes in all locations. Therefore, we used the following  
181 decision rules to assign missing weightings:

- 182 1. If a species was not observed on visual surveys for a given  $\log_2$  size-class in one  
183 location, but was observed in that size-class in other locations, isotope samples  
184 for the size-class/location combinations where it was not observed were assigned  
185 the mean weighting for that size-class from those locations where it was observed.
- 186 2. If a species was not observed in a given  $\log_2$  size-class in any location, isotope  
187 samples for that species/size-class were assigned a weighting of half of the lowest  
188 weighting from all other species observed in that size-class and location.
- 189 3. If no fish of any species were observed in a  $\log_2$  size-class in any location, samples  
190 were assigned a weighting of 0.5

191 Using these weightings, we modeled biomass spectra as hierarchical linear regression  
192 with  $\log_2(M)$  as the predictor and  $\log_2 \delta^{15}\text{N}$  as the response. The spatially nested  
193 sampling design was accounted for by allowing intercept to vary randomly with location.  
194 Slope and intercept were allowed to vary randomly by species. PPMR was calculated  
195 from the global regression slope ( $\beta$ ) as  $\text{PPMR} = 2^{\Delta^{15}\text{N}/\beta}$  assuming a fractionation rate  
196 ( $\Delta^{15}\text{N}$ ) of 3.2 ‰.

197 We recognise that our Bayesian methodology is potentially susceptible to bias since the  
198 data were not weighted by their proportional contribution to total community biomass.  
199 However, the fact that we obtained an almost identical PPMR estimate (5861) using a  
200 biomass weighted hierarchical linear model gives confidence that the PPMR estimate  
201 we obtained from the Bayesian model accurately reflects the true community PPMR.  
202 The insensitivity of the PPMR estimate to species weightings is a result of the fact that  
203 species-level slopes for the relationship between trophic position and body size are all  
204 similar (and positive) in this system (figure S3). Weighting by biomass would be more  
205 important if slopes varied widely among species, as observed in the North Sea [13], and  
206 developing methods that both account for uncertainty and allow for species biomass  
207 weightings will be an important goal for future studies.

## 208 **Supplementary materials for results**

### 209 **Species surveyed and sampled**

**Table S1:** Species surveyed on transects and sampled for stable isotope analysis, with visually assessed stomach contents

| species                                               | n surveyed | n sampled | mass range surveyed (g) | mass range sampled (g) | prey items<br>(no. of sampled fish for which item present in gut) |       |                          |                     |   |
|-------------------------------------------------------|------------|-----------|-------------------------|------------------------|-------------------------------------------------------------------|-------|--------------------------|---------------------|---|
|                                                       |            |           |                         |                        | fish                                                              | crabs | other reef invertebrates | pelagic zooplankton |   |
| Yellowtail rockfish ( <i>Sebastes flavidus</i> )      | 1837       | 20        | 33–495                  | 3–1300                 | 3                                                                 | 0     | 0                        | 0                   | 0 |
| Black rockfish ( <i>Sebastes melanops</i> )           | 1452       | 34        | 36–1923                 | 10–1563                | 16                                                                | 0     | 8                        | 6                   | 6 |
| Kelp greenling ( <i>Hexagrammos decagrammus</i> )     | 476        | 23        | 34–1950                 | 80–1075                | 6                                                                 | 10    | 8                        | 7                   | 7 |
| Copper rockfish ( <i>Sebastes caurinus</i> )          | 245        | 42        | 38–1297                 | 14–2400                | 11                                                                | 15    | 13                       | 9                   | 9 |
| Quillback rockfish ( <i>Sebastes maliger</i> )        | 195        | 33        | 40–1273                 | 9–1180                 | 9                                                                 | 8     | 8                        | 8                   | 8 |
| China rockfish ( <i>Sebastes nebulosus</i> )          | 128        | 26        | 39–1050                 | 4–884                  | 3                                                                 | 15    | 9                        | 1                   | 1 |
| Puget Sound rockfish ( <i>Sebastes emphaeus</i> )     | 106        | 0         | 85–119                  |                        |                                                                   |       |                          |                     |   |
| Painted greenling ( <i>Oxylebius pictus</i> )         | 32         | 1         | 43–216                  | 40–40                  | 0                                                                 | 0     | 1                        | 0                   | 0 |
| Lingcod ( <i>Ophiodon elongatus</i> )                 | 26         | 27        | 208–1381                | 478–17900              | 12                                                                | 0     | 1                        | 1                   | 1 |
| Striped perch ( <i>Embiotoca lateralis</i> )          | 13         | 0         | 129–678                 |                        |                                                                   |       |                          |                     |   |
| Vermillion rockfish ( <i>Sebastes miniatus</i> )      | 9          | 1         | 262–883                 | 800–800                | 0                                                                 | 0     | 0                        | 0                   | 0 |
| Canary rockfish ( <i>Sebastes pinniger</i> )          | 4          | 12        | 110–951                 | 240–1450               | 0                                                                 | 0     | 0                        | 1                   | 1 |
| Cabezon ( <i>Scorpaenichthys marmoratus</i> )         | 4          | 2         | 1248–1862               | 1450–7500              | 0                                                                 | 1     | 1                        | 0                   | 0 |
| Rock greenling ( <i>Hexagrammos lagocephalus</i> )    | 3          | 0         | 355–355                 |                        |                                                                   |       |                          |                     |   |
| Red Irish lord ( <i>Hemilepidotus hemilepidotus</i> ) | 3          | 4         | 49–226                  | 90–170                 | 1                                                                 | 1     | 2                        | 0                   | 0 |
| Tiger rockfish ( <i>Sebastes nigrocinctus</i> )       | 1          | 0         | 97–97                   |                        |                                                                   |       |                          |                     |   |
| Kelp perch ( <i>Brachyistius frenatus</i> )           | 1          | 0         | 94–94                   |                        |                                                                   |       |                          |                     |   |
| Buffalo sculpin ( <i>Enophrys bison</i> )             | 1          | 0         | 639–639                 |                        |                                                                   |       |                          |                     |   |
| Brown Irish lord ( <i>Hemilepidotus spinosus</i> )    | 1          | 0         | 441–441                 |                        |                                                                   |       |                          |                     |   |
| Yelloweye rockfish ( <i>Sebastes ruberrimus</i> )     | 0          | 3         |                         | 2750–6300              | 1                                                                 | 0     | 1                        | 0                   | 0 |
| Silvergrey rockfish ( <i>Sebastes brevispinus</i> )   | 0          | 1         |                         | 1160–1160              | 0                                                                 | 0     | 0                        | 0                   | 0 |
| Halibut ( <i>Hippoglossus stenolepis</i> )            | 0          | 3         |                         | 6800–31200             | 1                                                                 | 1     | 0                        | 0                   | 0 |
| Brown rockfish ( <i>Sebastes auriculatus</i> )        | 0          | 1         |                         | 250–250                | 1                                                                 | 0     | 1                        | 0                   | 0 |
| Bocaccio ( <i>Sebastes paucispinis</i> )              | 0          | 1         |                         | 1800–1800              | 0                                                                 | 0     | 0                        | 0                   | 0 |

**Figure S2:** Probability density plots from the jackknife analysis showing the distribution of PPMR estimates obtained, excluding one species at a time from the model. Colour coding indicates the individual species excluded in each iteration. The single line that is slightly distinct from the others represents Yellowtail rockfish.

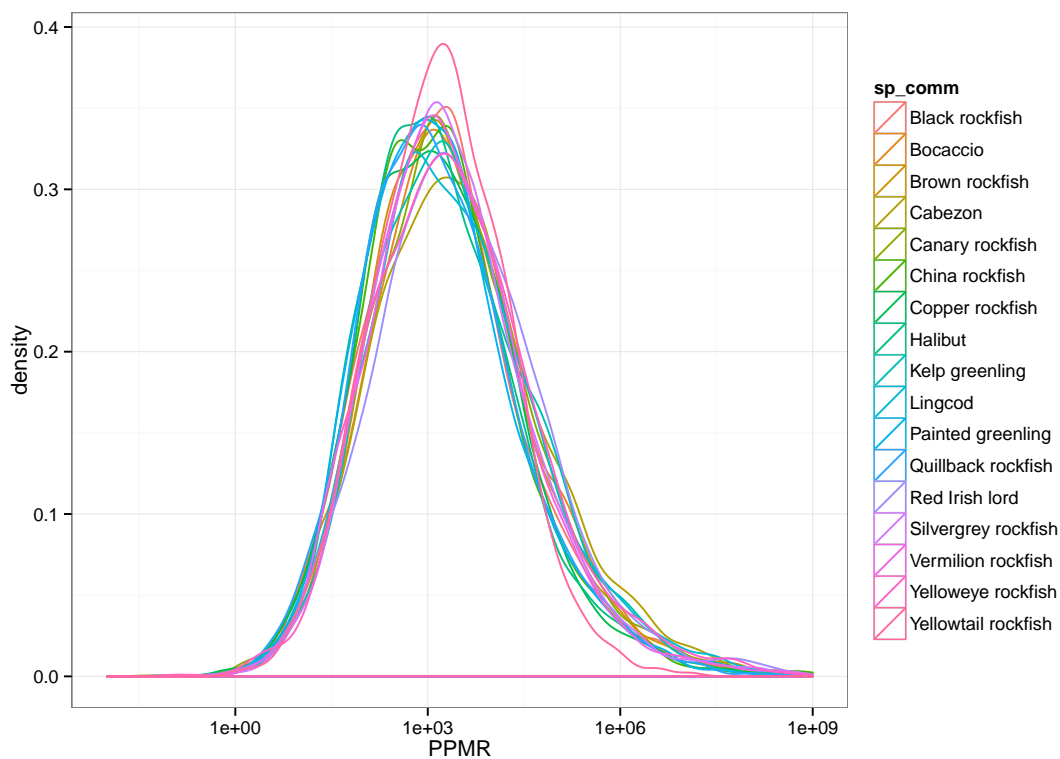

**Figure S3:** Species-level slope estimates from weighted hierarchical linear model fit with `lmer` vs. the non-weighted hierarchical Bayesian model fit using `JAGS` that incorporates measurement errors. The global slope estimates are shown as coloured vertical lines and are nearly the same. Area of dots is proportional to the weights for `lmer` model points and held constant for `JAGS` model points. Confidence intervals are  $\pm 1.96$  random effect standard errors for `lmer` and 2.5 and 97.5 quantiles for `JAGS`. Estimates are ordered by decreasing `JAGS` estimate from top to bottom.

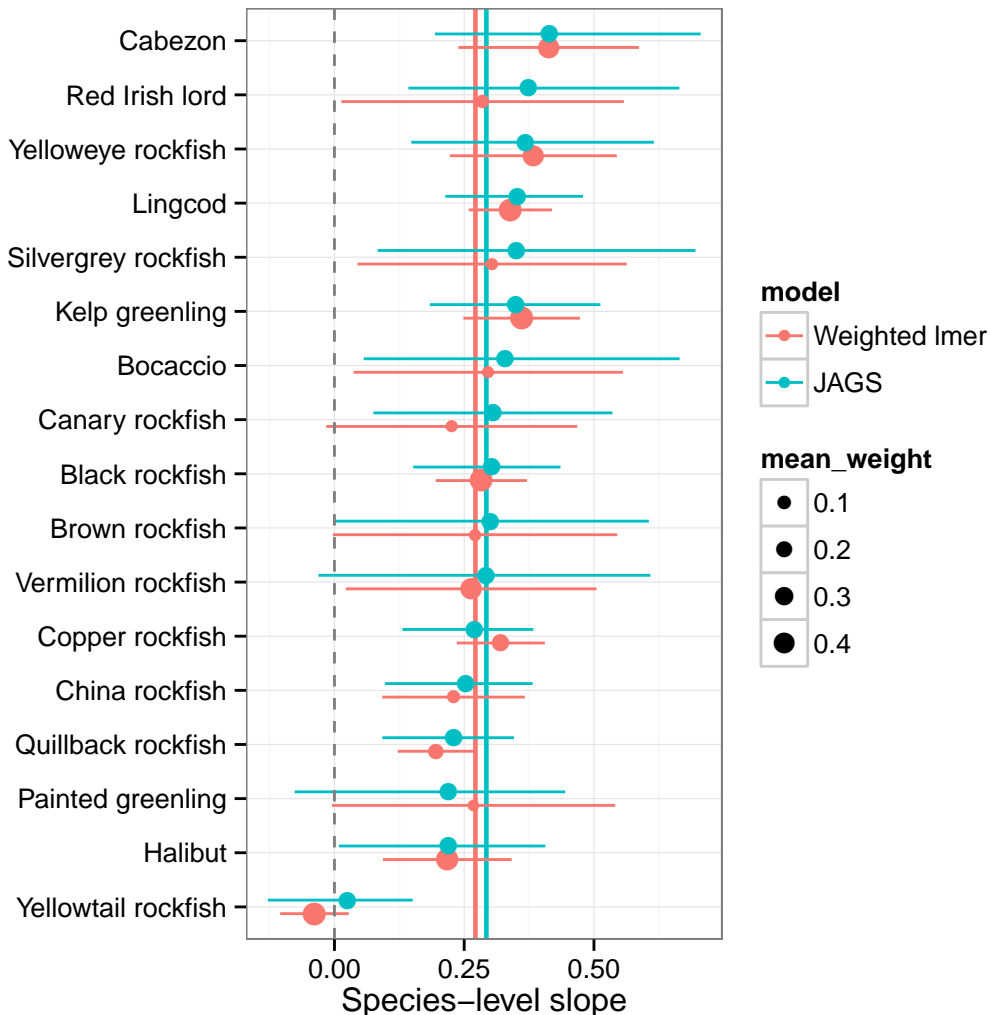

## 211 References

- 212 [1] Trebilco R, Demes KW, Lee LC, Keeling BE, Sloan NA, Stewart HL, Salomon  
213 AK, 2014 Summary of Baseline Kelp Forest Surveys Within and Adjacent to Gwaii  
214 Haanas National Park Reserve, National Marine Conservation Area Reserve and  
215 Haida Heritage Site, Haida Gwaii, British Columbia, Canada. *Can. Data Rep.*  
216 *Fish. Aquat. Sci.* **1252**. [www.dfo-mpo.gc.ca/Library/352932.pdf](http://www.dfo-mpo.gc.ca/Library/352932.pdf)
- 217 [2] Watson RA, Carlos GM, Samoily MA, 1995 Bias introduced by the non-random  
218 movement of fish in visual transect surveys. *Ecol. Model.* **77**, 205–214
- 219 [3] Jennings S, Mackinson S, 2003 Abundance-body mass relationships in size-  
220 structured food webs. *Ecol. Lett.* **6**, 971–974
- 221 [4] Gelman A, 2006 Prior distributions on variance parameters in hierarchical models.  
222 *Bayesian Analysis* **1**, 515–533
- 223 [5] Sweeting C, Barry J, Barnes C, Polunin N, Jennings S, 2007 Effects of body size  
224 and environment on diet-tissue  $\delta^{15}\text{N}$  fractionation in fishes. *J. Exp. Mar. Biol.*  
225 *Ecol.* **340**, 1–10
- 226 [6] Minagawa M, Wada E, 1984 Stepwise enrichment of  $^{15}\text{N}$  along food chains: Further  
227 evidence and the relation between  $\delta^{15}\text{N}$  and animal age. *Geochimica et Cosmochim-*  
228 *ica Acta* **48**, 1135–1140
- 229 [7] Post D, 2002 Using stable isotopes to estimate trophic position: models, methods,  
230 and assumptions. *Ecology* **83**, 703–718
- 231 [8] Wyatt A, Waite A, Humphries S, 2010 Variability in Isotope Discrimination Factors  
232 in Coral Reef Fishes: Implications for Diet and Food Web Reconstruction. *PLoS*  
233 *One* **5**, e13682
- 234 [9] Hussey NE, MacNeil MA, McMeans BC, Olin JA, Dudley SFJ, Cliff G, Wintner  
235 SP, Fennessy ST, Fisk AT, 2014 Rescaling the trophic structure of marine food  
236 webs. *Ecol. Lett.* **17**, 239–250

- 237 [10] Plummer M, 2003 JAGS: A program for analysis of Bayesian graphical models  
238 using Gibbs sampling. In *Proceedings of the 3rd International Workshop on Dis-*  
239 *tributed Statistical Computing (DSC 2003)*. Version 3.4.0
- 240 [11] Gelman A, Carlin JB, Stern HS, Dunson DB, Vehtari A, Rubin DB, 2014 *Bayesian*  
241 *Data Analysis*. Chapman & Hall
- 242 [12] Bates D, Maechler M, Bolker B, Walker S, 2013 *lme4: Linear mixed-effects models*  
243 *using Eigen and S4*. R package version 1.0-5
- 244 [13] Jennings S, Pinnegar J, Polunin N, Boon T, 2001 Weak cross-species relationships  
245 between body size and trophic level belie powerful size-based trophic structuring  
246 in fish communities. *J. Anim. Ecol.* **70**, 934–944
